# Supplementary material for: c-Abl Tyrosine Kinase Is Regulated Downstream of the Cytoskeletal Protein Synemin in Head and Neck Squamous Cell Carcinoma Radioresistance and DNA Repair
Source: MDPI journal article supplement (doi:10.3390/ijms21197277), 2020-10-01
Supplement: s1 [file s1]

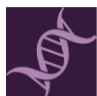

# **c-Abl tyrosine kinase is regulated downstream of the cytoskeletal protein synemin in head and neck squamous cell carcinoma radioresistance and DNA repair**

Sara Sofia Deville, Luis Fernando Delgadillo and Anne Vehlow and Nils Cordes

Supplementary Figures

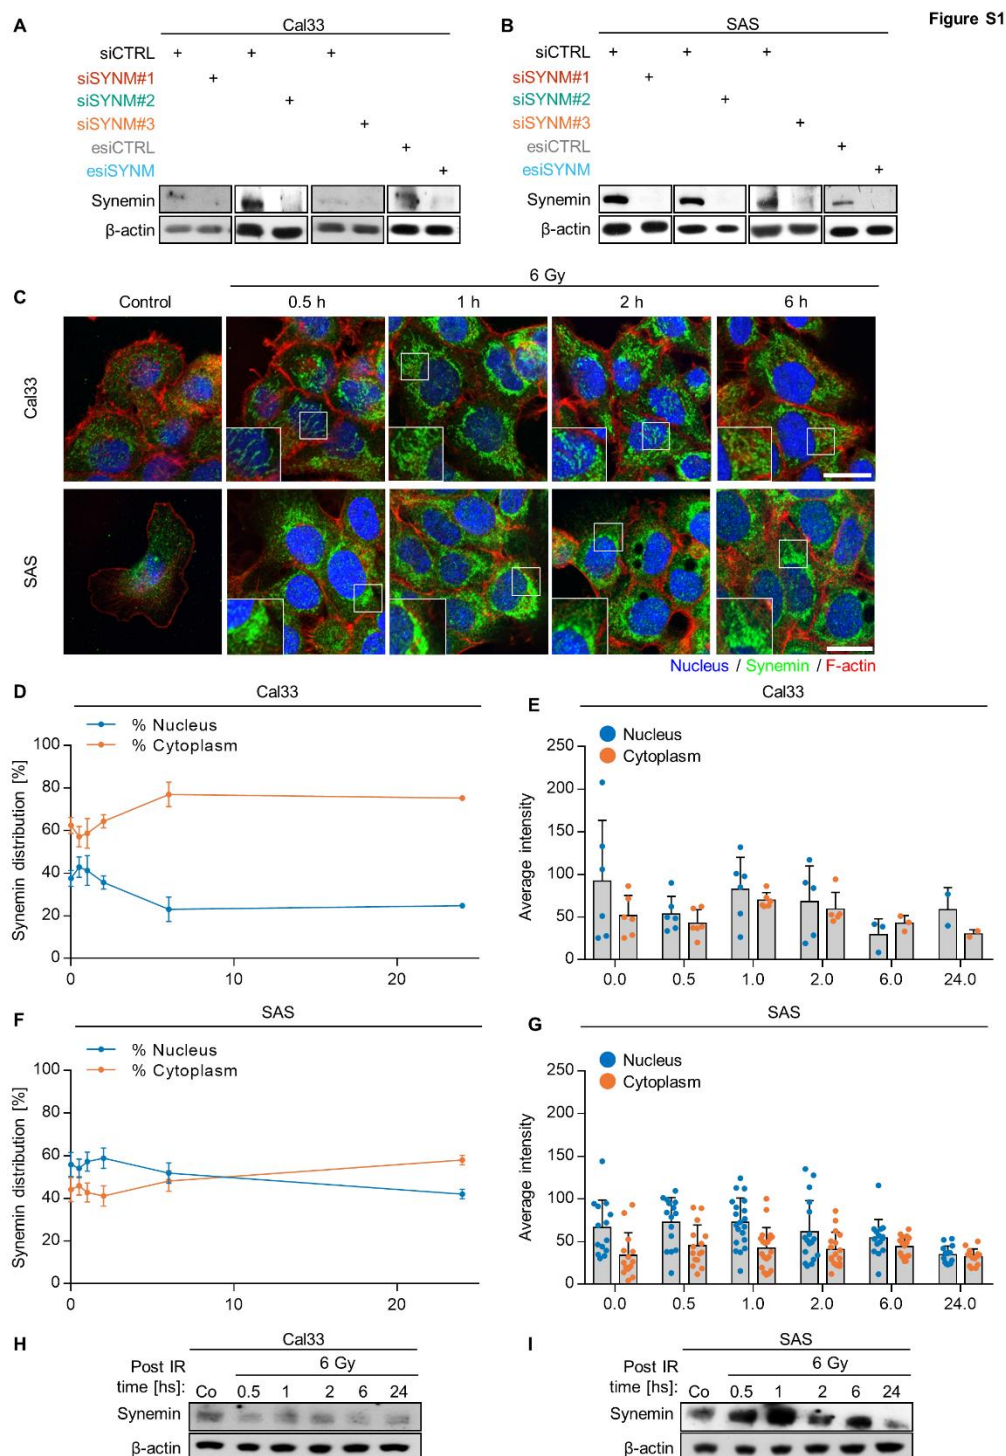

**Figure S1.** Characterization of synemin upon X-Ray irradiation. **A, B**, Knockdown efficiencies using three different siRNAs and one esiRNA for synemin silencing in Cal33 (**A**) and SAS (**B**) cells. **C**, Immunofluorescence staining of synemin (green) and its kinetics in Cal33 and SAS cells upon 6 Gy X-rays. Cells were counterstained for F-actin (red) and nucleus (blue) (bar, 20  $\mu$ m). **D-G**, Kinetic analyses using Fiji software of confocal images showing synemin's intracellular distribution in Cal33 and SAS cell lines. Ratio of mean fluorescence intensity of nuclear to cytoplasmic localization (**D,F**) and average intensity (**E,G**) were determined using the Intensity Ratio Nuclei Cytoplasm Tool plugin (NIH, USA). **H,I**, Western blots of synemin expression kinetics in whole cell lysates from Cal33 and SAS cells post 6 Gy irradiation.  $\beta$ -actin served as loading control.

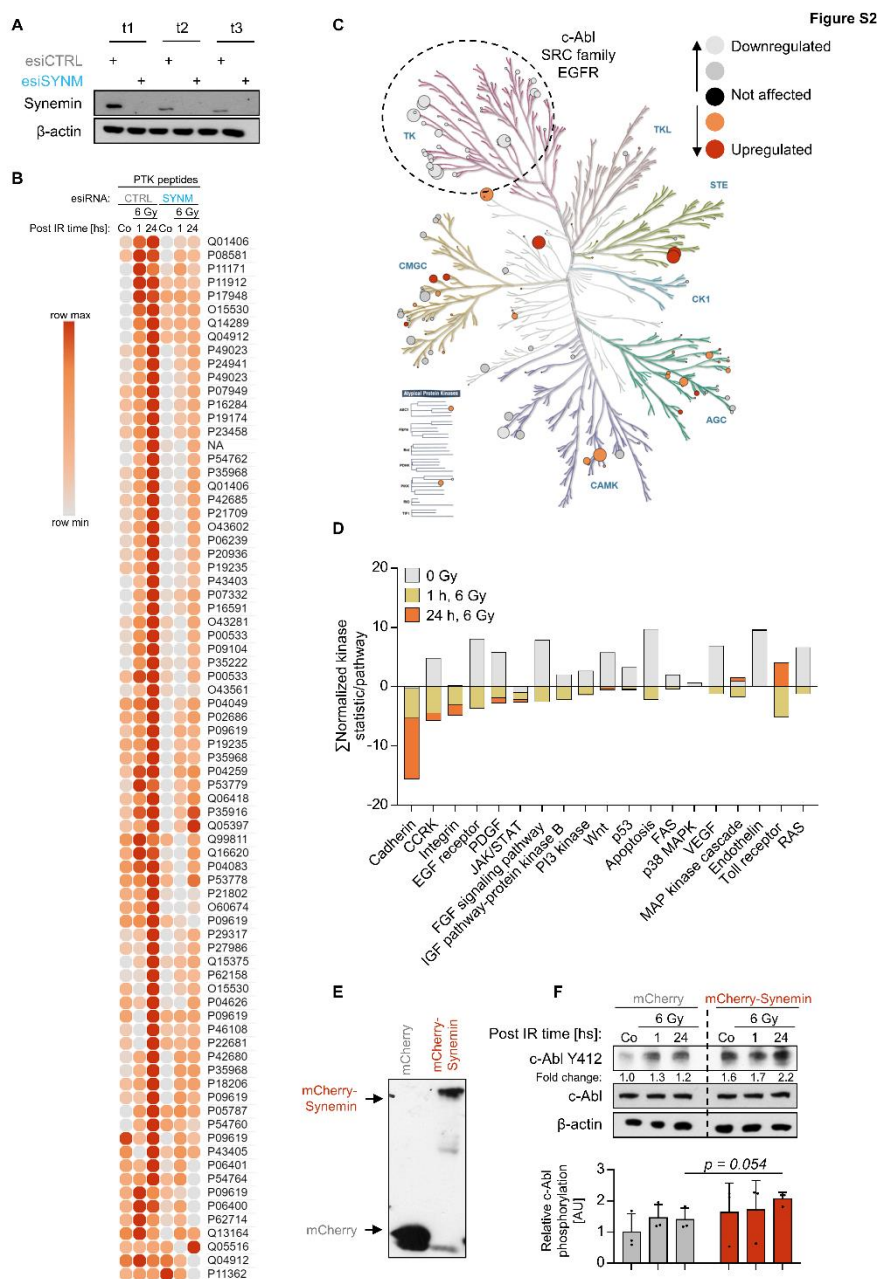

**Figure S2. Synemin regulates tyrosine kinase activity, in particular c-Abl kinase.** **A**, Western blots of knockdown efficiencies of samples employed for PAMgene-based kinome analysis. β-actin served as loading control. **B**, Heatmap of phosphorylated peptides from tyrosine kinases of control and synemin knockdown samples before and after 1 and 24 h X-ray irradiation (n=3). **C**, Kinase family tree of down- and up-regulated kinases 24 h post irradiation and synemin knockdown. Black dotted circle shows tyrosine kinases. **D**, Pathway classification of the de-regulated kinases using Panther analysis (<http://www.pantherdb.org/>). The mean kinase statistic of each kinase involved in the same pathway was summed to obtain an overall pathway related kinase statistic. **E**, Western blot on whole cell lysates from mCherry-Synemin transfectants at different time points post 6 Gy X-ray irradiation. β-actin served as loading control. **F**, Western blot of c-Abl expression and phosphorylation from whole cell lysates of synemin-overexpressing cells. Densitometries of Western blots shown in “E” from synemin-depleted, 6-Gy irradiated cells showing phosphorylated forms of c-Abl (n=3). Phosphorylation levels were calculated relative to the total amount of c-Abl. Data are presented as mean ± SD (n = 3; two-sided t-test).

**A****Figure S3**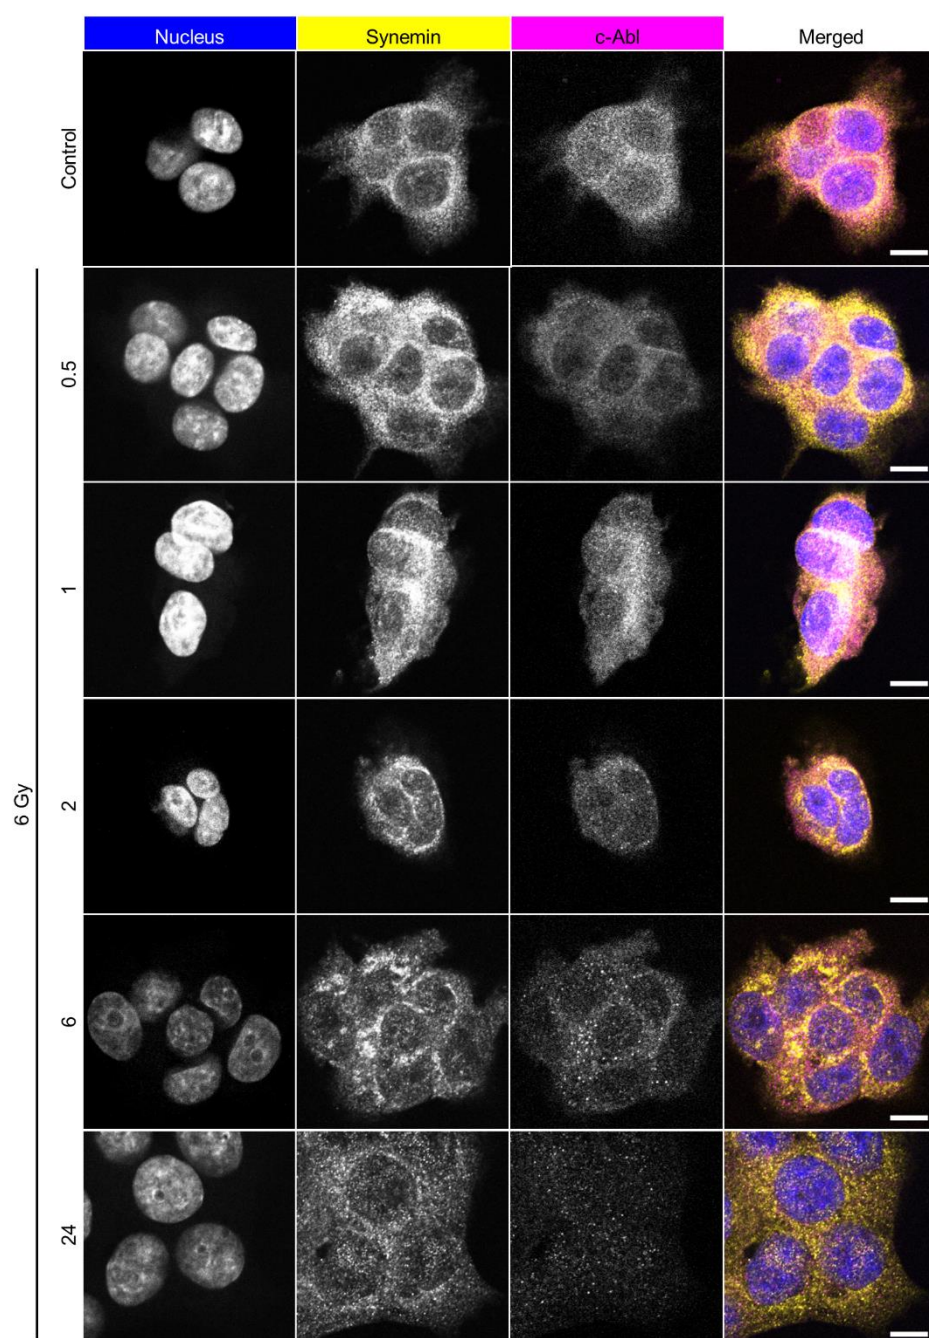

**Figure S3.** Synemin/c-Abl colocalization after X-ray exposure. **A**, Immunofluorescence staining of synemin and c-Abl in SAS cells after 6 Gy irradiation. Samples were fixed and analyzed at different time points (0.5, 1, 2, 6 and 24 h) post X-ray exposure (bar, 20 μm).



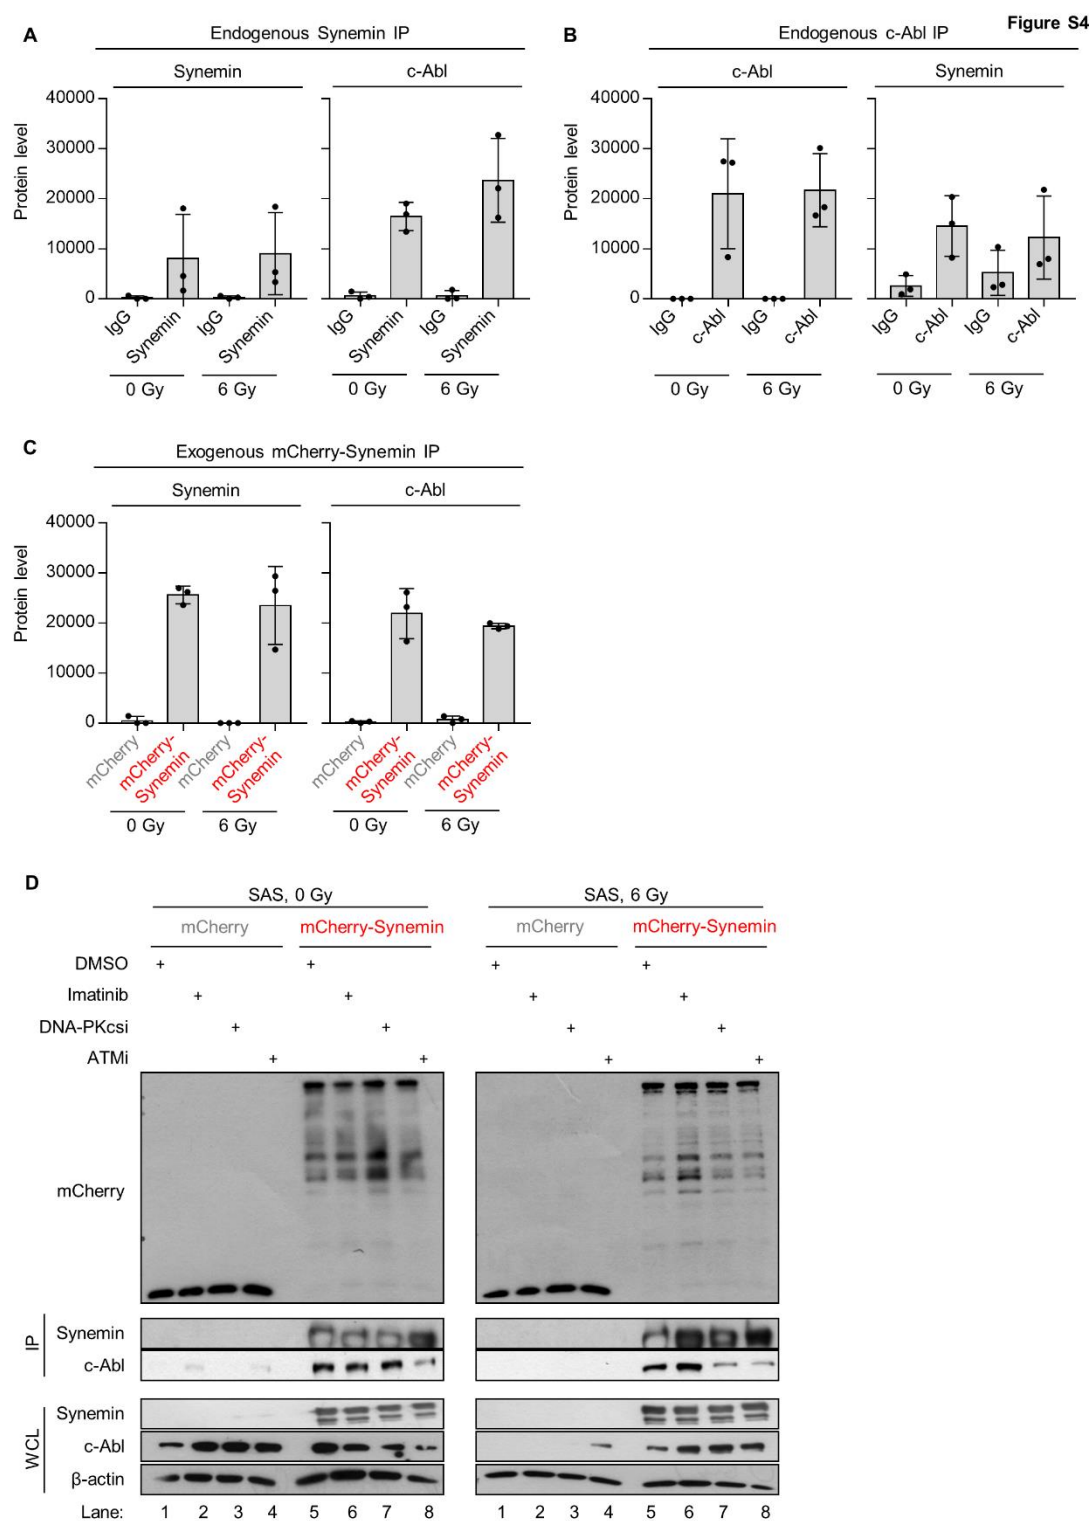

**Figure S4.** Synemin/c-Abl interact in an ATM-dependent manner. **A**, Densitometries of endogenous synemin immunoprecipitations (IPs) from Figure 4B. **B**, Densitometries of endogenous c-Abl IPs from Figure 4C. **C**, Densitometries of exogenous mCherry (empty vector) and mCherry-Synemin IPs from Figure 4D. **D**, Western blots on mCherry immunoprecipitates from mCherry-SAS and mCherry-Synemin-SAS cells after a 1-h pretreatment with Imatinib, DNA-PKcsi or ATMi alone or in combination with 6 Gy X-rays. IP, immunoprecipitate; WCL, whole cell lysates.
